# Supplementary material for: The association between nurse staffing levels and the timeliness of vital signs monitoring: a retrospective observational study in the UK
Source: PubMed Central journal article supplement (PMC6773325; doi:10.1136/bmjopen-2019-032157), 2019-09-27
Supplement: bmjopen-2019-032157supp001.pdf [file bmjopen-2019-032157supp001.pdf]

## SUPPLEMENTARY MATERIAL

### A1 Summary of study hospital escalation and vital sign monitoring protocol

| Early warning Score                          | Risk category | Max interval between observations        | Nurse Actions                                                                   | Doctor Actions                                                              |
|----------------------------------------------|---------------|------------------------------------------|---------------------------------------------------------------------------------|-----------------------------------------------------------------------------|
| 0-1                                          | Low           | 6 hours / 12 Hours If stable for 6 hours | (None specified – observations as per schedule)                                 |                                                                             |
| 2                                            | Low           | 6 hours                                  | (None specified – observations as per schedule)                                 |                                                                             |
| 3-5                                          | Medium        | 4 hours                                  | Inform nurse in charge                                                          |                                                                             |
| <6, but with one or more individual triggers | High          | 4 hours                                  | Registered nurse to inform doctor (FY2 / SHO)                                   | See patient within 2 hours                                                  |
| 6                                            | High          | 4 hours                                  | Registered nurse to inform doctor (FY2 / SHO)                                   | See patient within 2 hours                                                  |
| 7-8                                          | High          | 1 hour                                   | Registered nurse to inform doctor (FY2 / SHO)<br>Consider continuous monitoring | See patient within 30 minutes<br>Call SpR / outreach (after 8.30 SpR / ICU) |
| 9+                                           | Critical      | 30 minutes                               | Registered nurse to inform doctor (SpR)<br>Consider continuous monitoring       | See patient within 15 minutes<br>Call SpR / outreach (after 8.30 SpR / ICU) |

*Extreme values on any one parameter may trigger a higher level of escalation than otherwise indicated*  
*Full policy can be found at :*  
<http://www.porthosp.nhs.uk/about-us/policies-and-guidelines/policies/Clinical/Deteriorating%20Patient%20Policy%20-%20Management.doc> (accessed 13/1/2018).  
*Adapted from Griffiths P, Ball J, Bloor K, et al. Nurse staffing levels, missed vital signs and mortality in hospitals: retrospective longitudinal observational study. Heal Serv Deliv Res 2018;6:1–120.*

**A2 Study flowchart**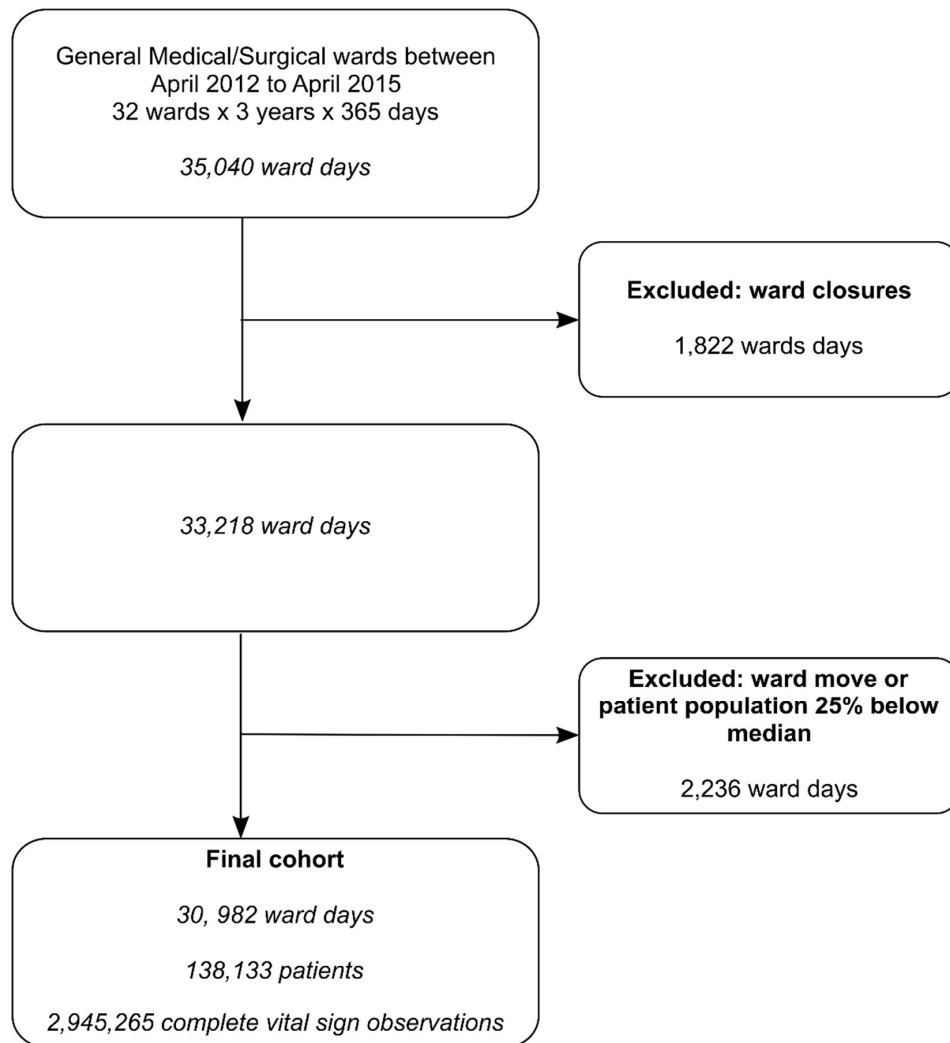

### A3 Mean staffing per ward

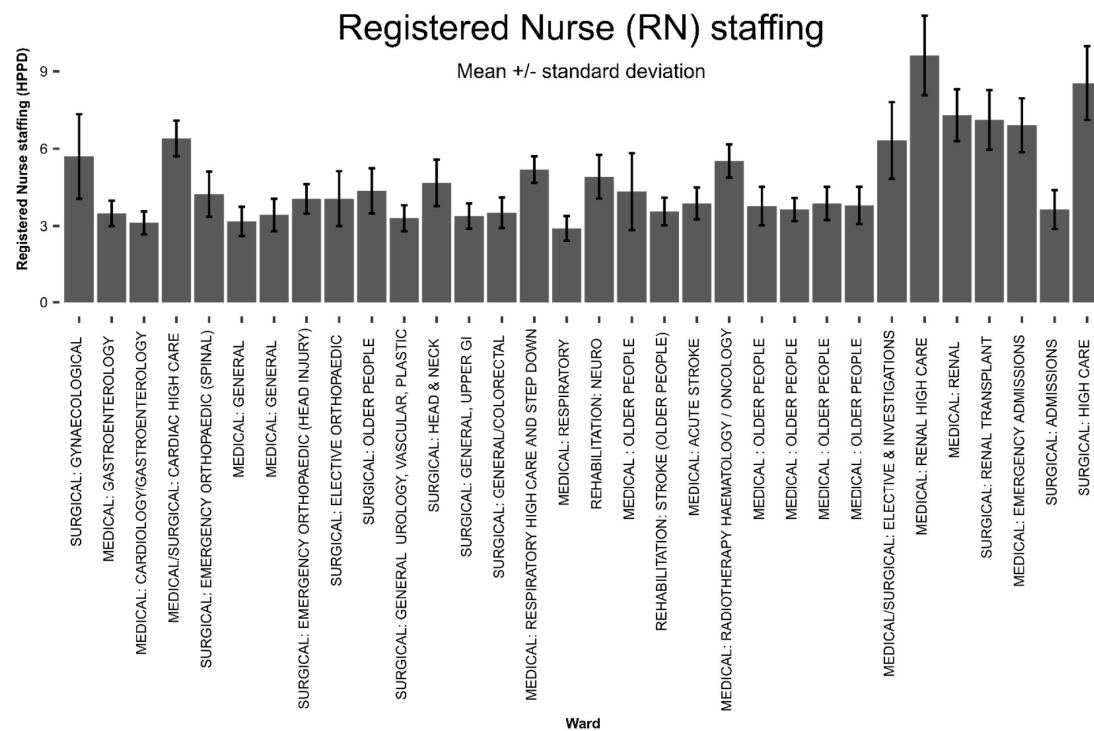

### A4 Missed observations (low and medium acuity)

The tables below show the relationship of staffing levels with respect to the primary outcome (missed observations) for low and medium acuity observations.

Table A4a Low acuity

|                                  | IRR   | 95% confidence Interval | p-value |
|----------------------------------|-------|-------------------------|---------|
| <b>RN staffing</b>               | 0.98  | 0.973-0.986             | < 0.001 |
| <b>NA staffing</b>               | 0.933 | 0.926-0.939             | < 0.001 |
| <b>Patient turnover</b>          | 1.04  | 1.03-1.04               | < 0.001 |
| <b>Higher acuity patients</b>    | 2.03  | 1.93-2.14               | < 0.001 |
| <b>RN staffing x NA staffing</b> | 1.02  | 1.02-1.02               | < 0.001 |

Table A4b Medium acuity

|                                  | IRR   | 95% confidence<br>Interval | p-value |
|----------------------------------|-------|----------------------------|---------|
| <b>RN staffing</b>               | 0.977 | 0.971-0.984                | < 0.001 |
| <b>NA staffing</b>               | 0.964 | 0.957-0.971                | < 0.001 |
| <b>Patient turnover</b>          | 0.989 | 0.984-0.995                | < 0.001 |
| <b>Higher acuity patients</b>    | 0.641 | 0.609-0.676                | < 0.001 |
| <b>RN staffing x NA staffing</b> | 1.01  | 1.00-1.01                  | < 0.001 |

### A5 Delayed observations

The tables below show the relationship of staffing levels with respect to the secondary outcome (delayed observations).

Table A5a All observations

|                                  | IRR   | 95% confidence<br>Interval | p-value |
|----------------------------------|-------|----------------------------|---------|
| <b>RN staffing</b>               | 0.984 | 0.981-0.987                | < 0.001 |
| <b>NA staffing</b>               | 0.98  | 0.976-0.983                | < 0.001 |
| <b>Patient turnover</b>          | 1     | 1.00-1.01                  | 0.0186  |
| <b>Higher acuity patients</b>    | 2.23  | 2.18-2.28                  | 0       |
| <b>RN staffing x NA staffing</b> | 1.01  | 1.00-1.01                  | < 0.001 |

Table A5b High acuity observations

|                                  | IRR   | 95% confidence<br>Interval | p-value |
|----------------------------------|-------|----------------------------|---------|
| <b>RN staffing</b>               | 0.987 | 0.978-0.996                | 0.0043  |
| <b>NA staffing</b>               | 1     | 0.993-1.01                 | 0.55    |
| <b>Patient turnover</b>          | 0.996 | 0.987-1.00                 | 0.38    |
| <b>Higher acuity patients</b>    | 1.03  | 0.960-1.10                 | 0.415   |
| <b>RN staffing x NA staffing</b> | 1     | 0.995-1.00                 | 0.943   |

### A6 Missed observations (tertiles of nurse staffing levels)

The table below shows the model used to explore interactions between NA and RN staffing groups (see Figure 1 in main manuscript).

Table A6 Mixed-effects Poisson regression with staffing variables modelled as tertiles: Association between staffing and all missed observations AIC: 215,999 BIC: 216,099

|                                 | IRR   | 95% confidence interval | p-value   |
|---------------------------------|-------|-------------------------|-----------|
| RN staffing Q2                  | 0.974 | 0.963-0.985             | p < 0.001 |
| RN staffing Q3                  | 0.934 | 0.923-0.946             | p < 0.001 |
| NA staffing Q2                  | 0.92  | 0.910-0.931             | p < 0.001 |
| NA staffing Q3                  | 0.919 | 0.908-0.931             | p < 0.001 |
| Patient turnover                | 1.01  | 1.01-1.02               | p < 0.001 |
| Higher acuity patients          | 4.83  | 4.68-4.99               | 0         |
| RN staffing Q2 x NA staffing Q2 | 1.02  | 0.999-1.03              | 0.0603    |
| RN staffing Q3 x NA staffing Q2 | 1.04  | 1.02-1.06               | p < 0.001 |
| RN staffing Q2 x NA staffing Q3 | 1.02  | 1.00-1.04               | 0.0525    |
| RN staffing Q3 x NA staffing Q3 | 1.05  | 1.03-1.07               | p < 0.001 |
